# Supplementary material for: Enhancing Genetic Medicine: Rapid and Cost-Effective Molecular Diagnosis for a GJB2 Founder Mutation for Hearing Impairment in Ghana
Source: PubMed Central journal article supplement (PMC7074138; doi:10.3390/genes11020132), 2020-01-27
Supplement: genes-11-00132-s001.pdf [file genes-11-00132-s001.pdf]

## Supplementary Materials

Table S1: Primer sequencing for *GJB2* and *GJB6* coding region amplification

| <b>Gene</b> | <b>Primer</b> | <b>Primer sequence</b>           | <b>Product size</b> |
|-------------|---------------|----------------------------------|---------------------|
| GJB2        | F4            | 5' -GCTTACCCAGACTCAGAGAAG-3'     | 900                 |
|             | R1            | 5'-CTTAATCTAACAACCTGGGCAATGC-3'  |                     |
| GJB6        | CDF           | 5'-TTGGCTTCAGTATGTAATATCACC-3'   | 990                 |
|             | CDR           | 5'-TCATTTACAAACTCTTCAGGCTACAG-3' |                     |

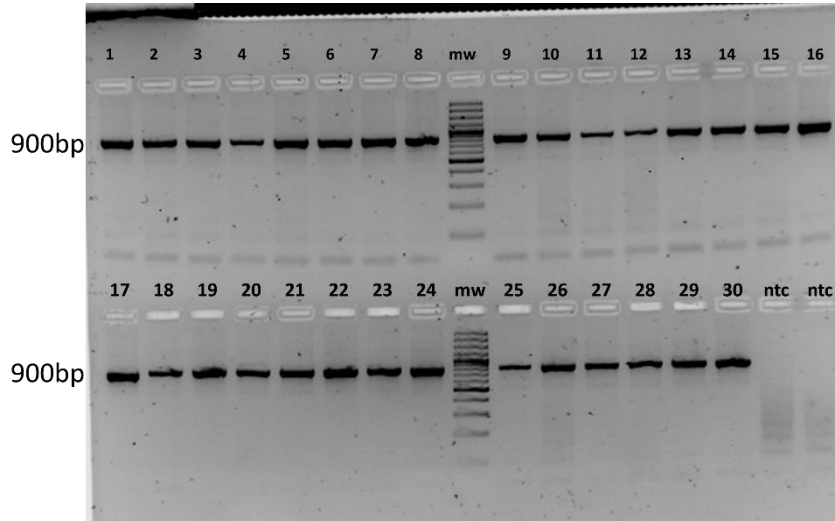

Figure S1: Representative agarose gel picture of *GJB2* exon 2 PCR products. The numbers 1 to 30 are the samples and "mw" and "ntc" are the molecular weight marker and the non-template controls respectively.
